# Supplementary material
Source: Springer Nature journal article supplement (https://www.springermedizin.de/resource/supplementary/13229_2013_160_MOESM4_ESM.pdf/9676214)
Supplement: MOESM4 [file 9676214]

**Additional File 3 – Comparison of the top-ranked differentially-expressed transcripts (p<0.001) across each of the six families with an old father.** Shown for each transcript is the corresponding rank in the overall old vs. young father group comparison. No data indicates a non-significant difference.

| Probe   | Gene          | Family 1    |          | Family 2    |          | Family 3    |          | Family 4    |          | Family 5    |          | Family 6    |          |
|---------|---------------|-------------|----------|-------------|----------|-------------|----------|-------------|----------|-------------|----------|-------------|----------|
|         |               | Fold Change | P Value  | Fold Change | P Value  | Fold Change | P Value  | Fold Change | P Value  | Fold Change | P Value  | Fold Change | P Value  |
| 10181   | TMPO          |             |          |             |          |             |          |             |          | 1.06        | 0.000592 | 0.96        | 0.001    |
| 50341   | NHSL1         |             |          |             |          | 1.06        | 0.001    |             |          |             |          | 0.92        | 1.93E-07 |
| 110048  | FBN1          |             |          |             |          | 1.06        | 0.000388 |             |          |             |          | 1.06        | 0.000704 |
| 360431  | SERPINA1A     |             |          |             |          | 0.91        | 5.66E-07 |             |          |             |          | 0.93        | 9.71E-06 |
| 450020  | SLC2A5        |             |          | 0.93        | 2.10E-05 |             |          |             |          |             |          | 0.94        | 0.00031  |
| 450400  | ATRX          |             |          |             |          | 1.04        | 0.000454 |             |          |             |          | 0.94        | 2.15E-05 |
| 510059  | FRYL          |             |          |             |          | 1.11        | 3.78E-09 |             |          | 1.06        | 8.37E-06 |             |          |
| 510735  | ANGPT1        |             |          |             |          | 0.89        | 1.11E-10 |             |          | 0.96        | 0.000308 |             |          |
| 540075  | CYP4F16       |             |          |             |          | 0.94        | 0.000405 |             |          |             |          | 0.9         | 7.83E-06 |
| 610075  | TIMM9         |             |          |             |          | 1.07        | 0.000963 |             |          | 0.94        | 0.001    |             |          |
| 630162  | NIPSNAP3A     |             |          | 0.95        | 0.000666 |             |          |             |          |             |          | 0.96        | 0.000775 |
| 650630  | SPNB2         |             |          |             |          |             |          |             |          | 1.15        | 0.000529 | 1.07        | 0.001    |
| 670050  | A430107D22RIK |             |          |             |          | 1.09        | 0.001    |             |          |             |          | 1.06        | 0.000213 |
| 670647  | RGS9          | 0.78        | 0.000174 |             |          |             |          | 0.81        | 0.000459 |             |          |             |          |
| 770372  | RWDD2B        |             |          |             |          | 1.08        | 8.50E-05 |             |          |             |          | 0.94        | 7.00E-04 |
| 830026  | B230118H07RIK | 0.96        | 0.001    |             |          | 0.94        | 8.69E-07 |             |          |             |          |             |          |
| 830563  | PRPF40B       |             |          |             |          | 0.94        | 3.29E-05 |             |          | 1.07        | 3.33E-05 |             |          |
| 940180  | PIK3IP1       |             |          |             |          | 0.94        | 0.000855 |             |          |             |          | 1.07        | 0.001    |
| 990349  | MOSPD1        |             |          | 1.07        | 0.000291 | 0.91        | 6.44E-06 |             |          |             |          |             |          |
| 1010435 | GSTO1         |             |          | 0.92        | 0.000314 |             |          |             |          | 1.07        | 0.000674 |             |          |
| 1010446 | MEX3C         | 1.04        | 0.001    |             |          | 1.04        | 0.000868 |             |          |             |          |             |          |

|         |               |      |          |      |          |      |          |      |          |      |          |      |          |
|---------|---------------|------|----------|------|----------|------|----------|------|----------|------|----------|------|----------|
| 1010653 | DNAJB4        |      |          |      |          |      |          |      |          | 1.04 | 1.43E-06 | 1.07 | 4.19E-07 |
| 1030768 | HCFC1R1       |      |          |      |          |      |          |      |          | 0.96 | 7.49E-05 | 0.96 | 0.000312 |
| 1050397 | OLFR559       | 1.05 | 1.57E-05 |      |          |      |          |      |          |      |          | 1.03 | 0.000784 |
| 1050521 | ADO           |      |          | 0.97 | 0.001    |      |          |      |          |      |          | 1.07 | 1.13E-06 |
| 1070187 | 6430527G18RIK |      |          |      |          |      |          |      |          | 0.94 | 0.001    | 0.94 | 0.000191 |
| 1070438 | DCUN1D3       |      |          |      |          | 1.09 | 2.27E-06 |      |          |      |          | 1.07 | 3.34E-05 |
| 1240324 | RAB8A         | 0.93 | 0.001    |      |          | 1.08 | 0.000488 |      |          |      |          |      |          |
| 1410091 | CALU          | 1.04 | 0.001    |      |          |      |          |      |          | 1.05 | 0.001    |      |          |
| 1450129 | ZP2           |      |          |      |          | 1.07 | 3.12E-05 |      |          |      |          | 1.05 | 0.000795 |
| 1450653 | PLA2G4A       |      |          |      |          |      |          |      |          | 0.96 | 0.000823 | 1.04 | 0.001    |
| 1510433 | D030070L09RIK |      |          |      |          | 1.1  | 0.000362 |      |          | 1.05 | 0.000645 |      |          |
| 1710474 | DGKQ          | 1.06 | 0.000308 |      |          | 0.95 | 0.000389 |      |          |      |          |      |          |
| 1770437 | ZIK1          |      |          |      |          |      |          |      |          | 1.04 | 0.000214 | 0.95 | 2.56E-05 |
| 1780079 | IL7R          | 0.95 | 0.001    | 0.96 | 0.000739 |      |          |      |          |      |          |      |          |
| 1780307 | CCL25         |      |          |      |          | 1.07 | 0.000265 |      |          |      |          | 1.07 | 0.000657 |
| 1990731 | DDT           |      |          |      |          | 0.95 | 9.81E-05 |      |          |      |          | 0.95 | 0.000162 |
| 2030025 | TMOD2         |      |          |      |          | 0.96 | 0.000589 |      |          |      |          | 0.95 | 0.000139 |
| 2030088 | DEFB19        |      |          |      |          | 1.05 | 0.000683 |      |          |      |          | 1.05 | 0.001    |
| 2060612 | KCTD10        |      |          |      |          | 0.97 | 3.00E-04 |      |          |      |          | 0.94 | 1.11E-06 |
| 2120356 | MYL2          |      |          |      |          | 1.08 | 0.001    |      |          | 0.91 | 0.00021  |      |          |
| 2190139 | SRPX2         | 1.04 | 0.000105 |      |          |      |          |      |          |      |          | 0.97 | 0.000712 |
| 2190612 | WIPI2         |      |          | 0.91 | 0.001    | 0.91 | 0.000741 |      |          |      |          |      |          |
| 2260398 | ZBTB7C        |      |          |      |          | 1.06 | 6.21E-05 |      |          |      |          | 1.06 | 0.000904 |
| 2320402 | PPARG         |      |          |      |          |      |          |      |          | 0.93 | 0.001    | 0.95 | 5.27E-05 |
| 2450463 | ARL3          |      |          | 1.08 | 0.000846 |      |          | 1.15 | 8.83E-07 |      |          |      |          |
| 2470044 | DEXI          | 0.91 | 0.000458 | 0.94 | 0.00021  |      |          |      |          |      |          |      |          |
| 2470343 | LCORL         |      |          |      |          | 0.96 | 0.000245 |      |          |      |          | 0.92 | 0.000462 |
| 2480243 | HERC3         |      |          |      |          | 1.05 | 0.001    | 0.91 | 0.001    |      |          |      |          |





|         |               |      |          |      |          |      |          |      |          |      |          |      |          |
|---------|---------------|------|----------|------|----------|------|----------|------|----------|------|----------|------|----------|
| 5670373 | CYHR1         |      |          |      |          |      |          | 0.95 | 0.00045  |      |          | 1.06 | 0.000285 |
| 5700722 | ECE1          | 1.13 | 1.62E-05 |      |          | 0.93 | 0.001    |      |          |      |          |      |          |
| 5720288 | NR5A1         |      |          |      |          | 0.91 | 5.06E-08 | 0.92 | 7.63E-05 |      |          |      |          |
| 5810170 | ASCC3L1       |      |          |      |          |      |          |      |          | 0.94 | 0.001    | 0.93 | 0.000323 |
| 5820681 | PRKCZ         |      |          |      |          | 1.08 | 8.29E-05 | 1.12 | 0.000348 | 0.92 | 8.79E-05 |      |          |
| 5820707 | JMY           |      |          |      |          | 0.95 | 0.000367 |      |          |      |          | 0.94 | 1.82E-06 |
| 5860253 | FIGLA         |      |          |      |          | 1.05 | 0.00012  |      |          |      |          | 1.06 | 1.64E-05 |
| 5860377 | USP15         |      |          |      |          | 0.94 | 2.91E-05 | 0.95 | 1.23E-05 |      |          |      |          |
| 5890139 | PDK2          | 1.07 | 0.000159 |      |          |      |          |      |          |      |          | 1.08 | 2.64E-05 |
| 5890762 | HTR3B         |      |          |      |          |      |          |      |          | 0.94 | 9.43E-06 | 0.91 | 7.40E-07 |
| 5900465 | 4921530G04RIK |      |          | 0.89 | 4.81E-06 |      |          |      |          |      |          | 0.93 | 0.000636 |
| 5900653 | ADAM17        |      |          |      |          | 0.94 | 0.000996 |      |          |      |          | 1.04 | 0.001    |
| 5910220 | OSMR          |      |          |      |          |      |          |      |          | 1.06 | 2.30E-05 | 1.08 | 4.08E-05 |
| 5960050 | SLC25A11      |      |          | 0.88 | 9.91E-06 |      |          | 0.89 | 2.25E-05 |      |          |      |          |
| 6040707 | GLI3          |      |          |      |          | 1.04 | 5.93E-05 | 1.05 | 4.87E-05 |      |          |      |          |
| 6220612 | APH1B         | 1.06 | 0.001    |      |          |      |          |      |          | 1.06 | 7.88E-05 |      |          |
| 6280168 | MPO           |      |          |      |          | 0.94 | 0.001    | 0.95 | 0.00078  |      |          |      |          |
| 6280520 | TRIP12        |      |          |      |          | 0.92 | 0.000137 |      |          |      |          | 0.93 | 0.000383 |
| 6330102 | SMC1A         |      |          |      |          | 0.93 | 4.09E-07 | 0.97 | 0.001    | 1.03 | 0.001    |      |          |
| 6330451 | P2RX5         | 0.95 | 0.000227 |      |          | 1.05 | 7.20E-05 |      |          |      |          |      |          |
| 6350402 | HS6ST1        |      |          |      |          | 0.88 | 2.15E-06 |      |          |      |          | 0.89 | 3.49E-05 |
| 6350437 | KATNAL1       |      |          | 0.93 | 0.000209 | 0.93 | 3.91E-05 |      |          |      |          |      |          |
| 6370674 | MYST1         |      |          |      |          | 1.07 | 0.001    |      |          |      |          | 0.93 | 9.01E-05 |
| 6400025 | LARP4         | 0.95 | 0.000488 |      |          |      |          | 0.94 | 2.52E-05 |      |          |      |          |
| 6480477 | EG331493      | 0.93 | 6.60E-07 |      |          |      |          |      |          |      |          | 0.94 | 7.20E-06 |
| 6510427 | ZFP523        |      |          |      |          | 1.09 | 0.000525 |      |          | 0.91 | 0.000417 |      |          |
| 6520484 | EIF4G2        |      |          |      |          | 1.15 | 0.000675 |      |          |      |          | 1.11 | 3.43E-05 |
| 6550309 | FXYD6         | 0.84 | 0.000436 |      |          | 0.82 | 6.79E-06 |      |          |      |          |      |          |

|         |               |      |          |      |          |      |          |      |          |      |          |      |          |
|---------|---------------|------|----------|------|----------|------|----------|------|----------|------|----------|------|----------|
| 6560152 | NDUFA5        |      |          |      |          | 1.15 | 1.25E-05 |      |          |      |          | 1.07 | 0.000811 |
| 6560692 | ST6GALNAC4    |      |          |      |          | 0.94 | 2.00E-04 | 0.94 | 0.000856 |      |          |      |          |
| 6590564 | GABRA1        | 1.05 | 0.000247 | 1.08 | 2.27E-05 |      |          |      |          |      |          |      |          |
| 6650220 | ANXA10        | 1.03 | 0.000137 |      |          | 1.03 | 1.90E-05 |      |          |      |          |      |          |
| 6650484 | TBPL2         |      |          |      |          | 0.95 | 0.000397 |      |          |      |          | 1.06 | 0.000158 |
| 6660152 | LOC100048726  |      |          |      |          |      |          |      |          | 1.05 | 0.001    | 1.1  | 2.43E-07 |
| 6770369 | COL17A1       |      |          |      |          |      |          | 1.06 | 9.63E-06 |      |          | 0.95 | 0.00084  |
| 6840328 | OTOR          |      |          |      |          | 0.93 | 8.78E-08 |      |          | 0.96 | 0.000737 |      |          |
| 6900133 | MTSS1         |      |          | 0.95 | 0.000825 |      |          |      |          |      |          | 1.04 | 5.27E-05 |
| 7100180 | TTLL1         | 0.94 | 0.001    |      |          | 1.07 | 0.000255 |      |          |      |          |      |          |
| 7100519 | CLK4          |      |          | 1.09 | 7.62E-07 |      |          |      |          |      |          | 1.06 | 8.97E-05 |
| 7150670 | MFSD8         |      |          |      |          |      |          | 1.07 | 5.57E-05 |      |          | 1.05 | 0.000387 |
| 7200035 | FGFR3         |      |          |      |          | 1.11 | 0.000696 |      |          |      |          | 1.12 | 0.000649 |
| 7210632 | PDE1A         |      |          | 0.86 | 0.000551 | 0.9  | 0.001    |      |          |      |          |      |          |
| 7210746 | 4933405O20RIK |      |          | 1.04 | 1.88E-05 |      |          |      |          |      |          | 1.05 | 0.001    |
| 7380382 | ZC3H18        | 1.11 | 0.000361 |      |          |      |          | 1.09 | 7.51E-07 |      |          |      |          |
| 7400546 | SUPT5H        | 1.17 | 0.000428 |      |          | 0.89 | 0.001    |      |          |      |          |      |          |
| 7400678 | C330005M16RIK |      |          |      |          | 0.95 | 3.20E-05 |      |          | 0.96 | 0.000294 |      |          |
| 7510609 | LOC100047391  |      |          |      |          |      |          |      |          | 0.95 | 7.16E-05 | 0.95 | 0.000996 |
| 7560097 | NARG2         |      |          |      |          |      |          | 1.05 | 0.000329 |      |          | 1.08 | 1.80E-06 |
| 7560228 | EAR10         |      |          |      |          |      |          | 0.96 | 0.000108 | 0.96 | 0.000323 |      |          |
| 7560291 | JUN           |      |          |      |          | 1.09 | 0.000896 |      |          |      |          | 1.11 | 0.000757 |
